# Supplementary material for: A Chinese Herbal Formula, Gengnianchun, Ameliorates β-Amyloid Peptide Toxicity in a Caenorhabditis elegans Model of Alzheimer's Disease
Source: PubMed Central journal article supplement (PMC5660795; doi:10.1155/2017/7480980), 2017-10-11
Supplement: 7480980.f1.pdf [file 7480980.f1.pdf]

## Supplementary material

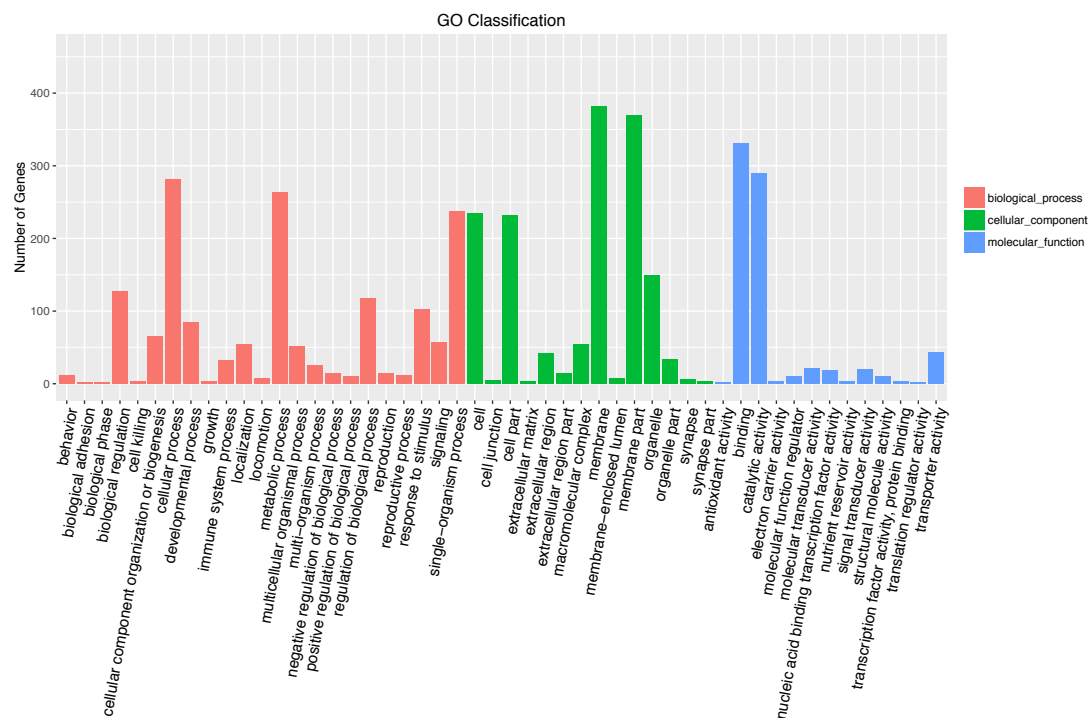

S. Figure 1: GO Biological Process analysis of the functional classes of differentially genes

**S. Table 1:** KEGG pathways related to the prolongevity effect of GNC

| Pathway ID | Pathway description          | p-value     |
|------------|------------------------------|-------------|
| cel04350   | TGF-beta signalling pathway  | 9.70E-06    |
| cel04310   | Wnt signalling pathway       | 1.93E-05    |
| cel04212   | Longevity regulating pathway | 0.149886179 |
| cel04068   | FoxO signalling pathway      | 0.28444136  |
| cel00190   | Oxidative phosphorylation    | 0.467135702 |
